# Supplementary material for: 3,3′-Diselenodipropionic acid immobilised gelatin gel: a biomimic catalytic nitric oxide generating material for topical wound healing application
Source: Royal Society of Chemistry journal article supplement (doi:10.1039/d2bm01964g), 2022-12-23
Supplement: d2bm01964g1.pdf [file d2bm01964g1.pdf]

## **3,3'-diselenodipropionic acid immobilized gelatin gel, a biomimic catalytic nitric oxide generating material for topical wound healing application**

Ram P. Das<sup>1,3</sup>, Beena G. Singh<sup>1,3</sup>, J. Aishwarya<sup>1,3,4</sup>, Liladhar B. Kumbhare<sup>2</sup>, Amit  
Kunwar<sup>1,3,\*</sup>

<sup>1</sup>Radiation & Photochemistry Division, <sup>2</sup>Chemistry Division, Bhabha Atomic Research  
Centre, Trombay, Mumbai-400085, India

<sup>3</sup>Homi Bhabha National Institute, Anushaktinagar, Mumbai –400094, India

<sup>4</sup>Advanced Centre for Treatment, Research and Education in Cancer, Mumbai – 410210,  
India

\*Corresponding authors

Radiation and Photochemistry Division,

Bhabha Atomic Research Centre,

Mumbai - 400085, India.

E-mail- [kamit@barc.gov.in](mailto:kamit@barc.gov.in)

Tel: 91-22-25592352, Fax: 91-22-25505151.

Supplementary Figures

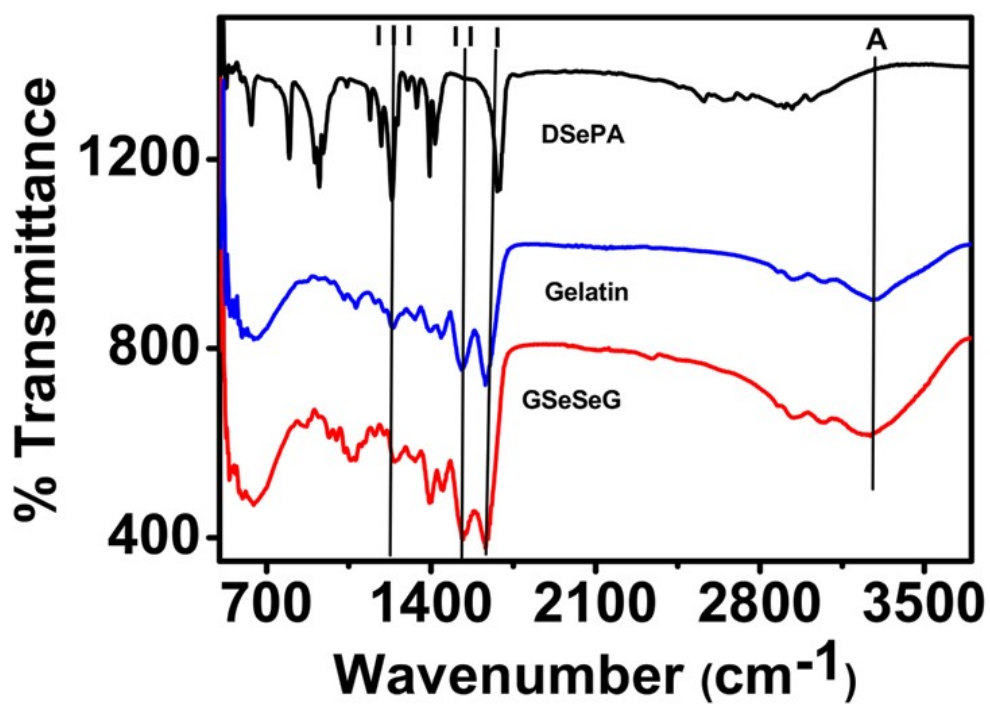

**Figure S1:** Plot represents the IR spectra of neat gelatin, DSePA and DSePA conjugated gelatin (G-Se-Se-G).

(A)

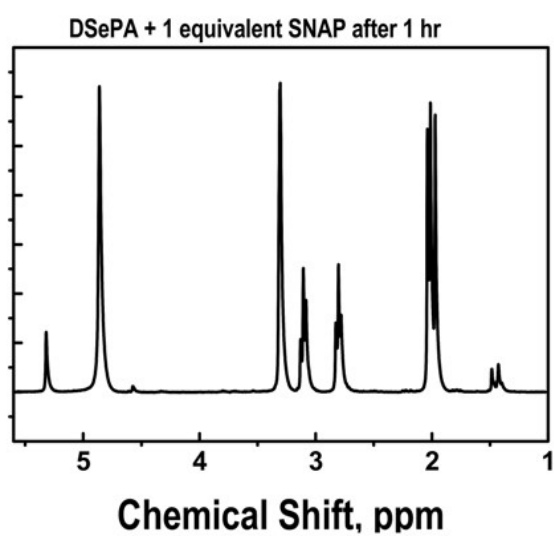

(B)

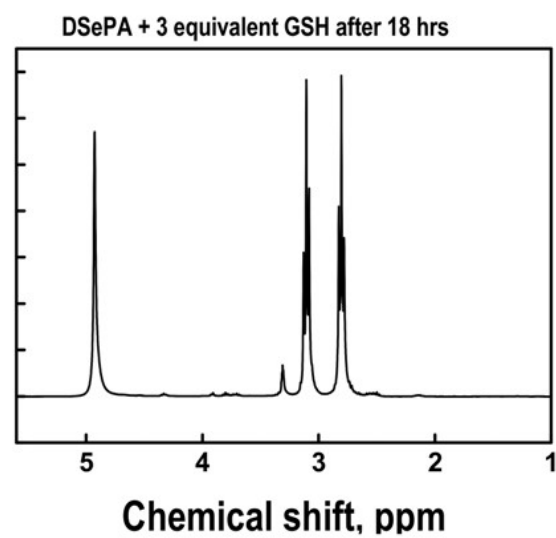

**Figure S2:** Plot A represent  $^1\text{H}$  NMR of, DSePA + SNAP (1:1) at 1 h and DSePA + GSH (1:3) at 18 h in methanol- $\text{d}_4$

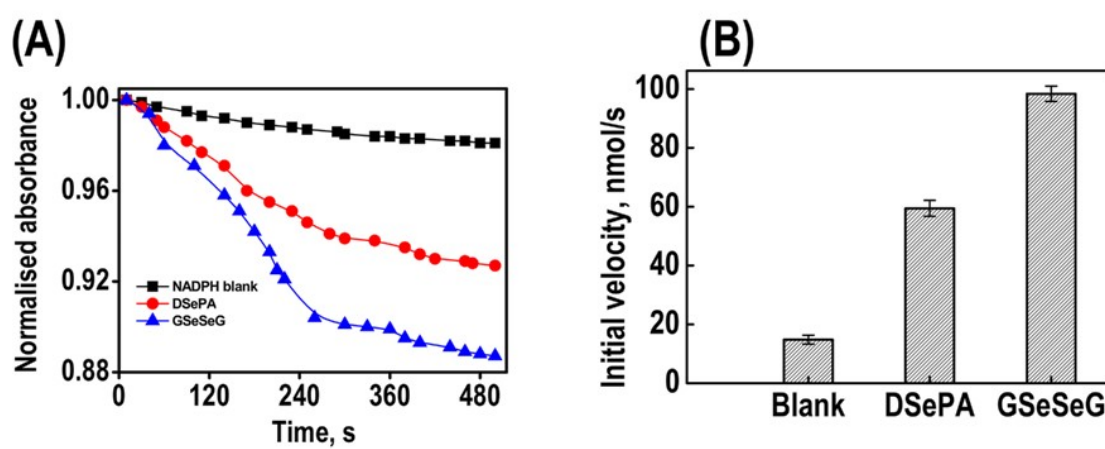

**Figure S3:** Plot A corresponds to the decay of NADPH with time. Plot B shows the initial velocity obtained after linear fitting of the initial decay data of NADPH with time.

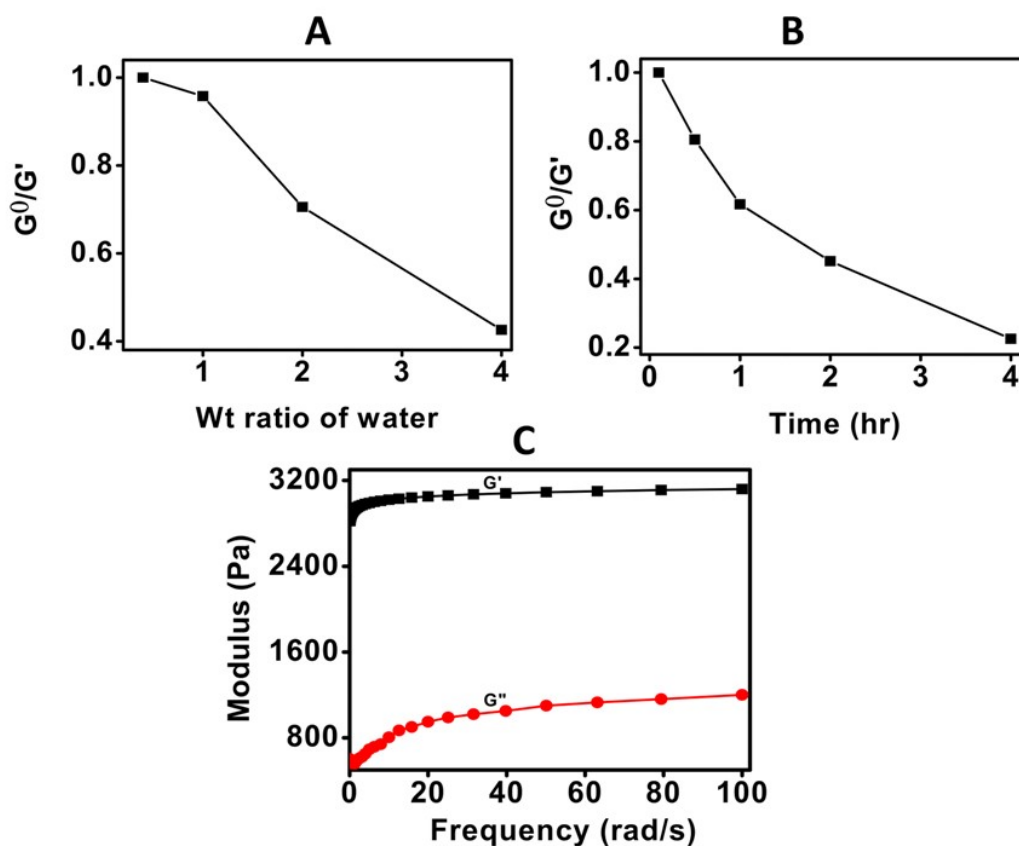

**Figure S4:** Plot A shows reduction in storage ( $G'$ ) moduli of G-Se-Se-G gel in the presence of different weight ratio of water. Plot B shows reduction in storage ( $G'$ ) moduli of G-Se-Se-G gel in presence of a fixed 4 weight ratio of water as a function of incubation time. Plot C shows the change of storage ( $G'$ ) and loss ( $G''$ ) moduli of G-Se-Se-G gel as a function of frequency change (1 - 100 rad/s) after six months of storage under sealed pack condition at ambient temperature.

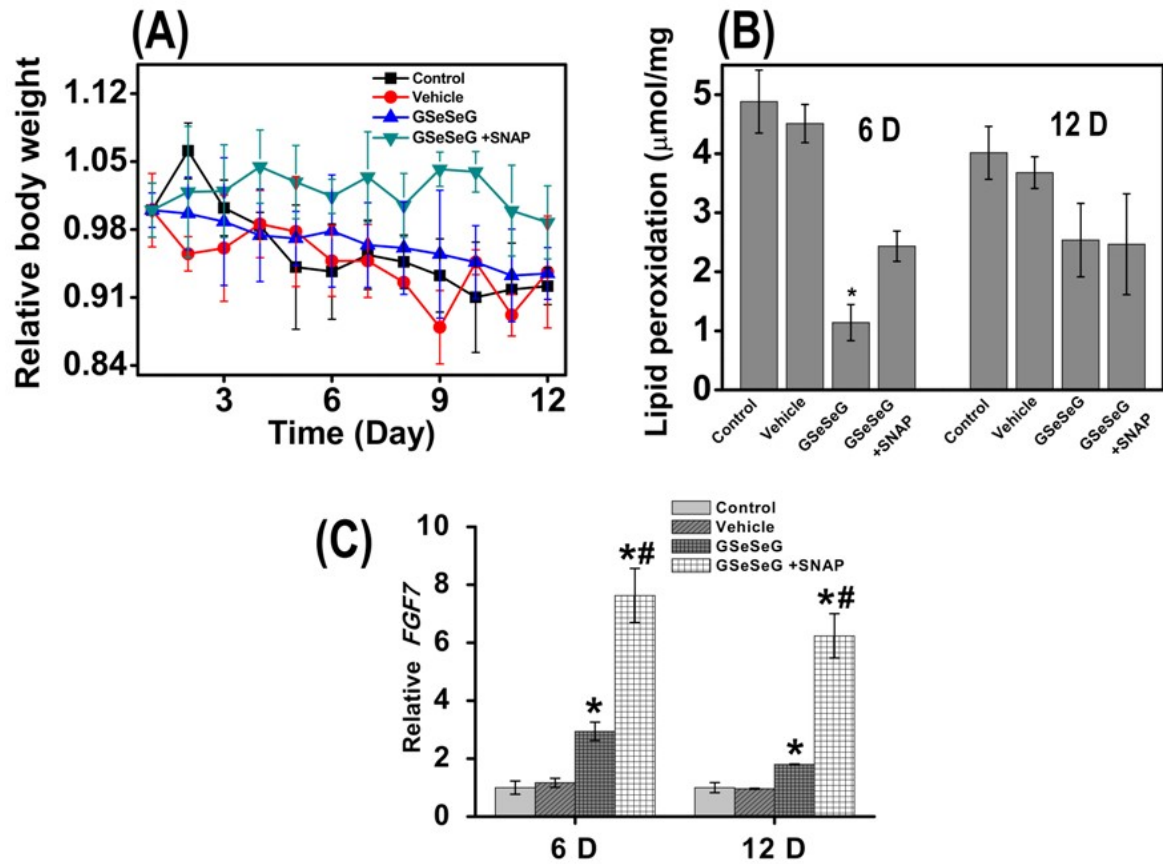

**Figure S5:** Plot A shows the relative change in body weight as a function of post-wounding time (in days) for different treatment groups. Plot B shows content of lipid peroxidation in wound lysate of different treatment groups on day 6<sup>th</sup> and 12<sup>th</sup> of post wounding. Plot C shows relative mRNA expression of FGF7 in the wound tissue of different treatment groups on day 6<sup>th</sup> and 12<sup>th</sup> of post wounding by RT-PCR. The expression of  $\beta$ -actin was used as an internal control. Results are represented as mean  $\pm$  SEM (n = 4) of an independent experiment. \* $<0.05$  as compared to control and vehicle groups; # $<0.05$  as compared to G-Se-Se-G group.
